# Supplementary material for: Health related quality of life in chronic kidney disease; a descriptive study in a rural Sri Lankan community affected by chronic kidney disease
Source: PubMed Central journal article supplement (PMC7178581; doi:10.1186/s12955-020-01369-1), 2020-04-23
Supplement: 12955_2020_1369_MOESM1_ESM.pdf [file 12955_2020_1369_MOESM1_ESM.pdf]

## Supplementary material

### Number of CKD patients selected from each MOH area for the study

|    |                          | <b>Total number of CKD patients recorded in the register</b> | <b>Proportion from each MOH area (%)</b> | <b>Number of CKD patients selected from each MOH area</b> |
|----|--------------------------|--------------------------------------------------------------|------------------------------------------|-----------------------------------------------------------|
| 1  | Madawachchiya            | 2635                                                         | 23.2                                     | 273                                                       |
| 2  | Padaviya                 | 1337                                                         | 11.8                                     | 138                                                       |
| 3  | Kabithigolawa            | 1053                                                         | 9.3                                      | 109                                                       |
| 4  | Rambewa                  | 937                                                          | 8.3                                      | 97                                                        |
| 5  | Kahatagasdigiliya        | 823                                                          | 7.3                                      | 85                                                        |
| 6  | Nuwaragampalatha Central | 661                                                          | 5.8                                      | 68                                                        |
| 7  | Horopothana              | 553                                                          | 4.9                                      | 57                                                        |
| 8  | Galenbidunuwewa          | 552                                                          | 4.9                                      | 57                                                        |
| 9  | Nuwaragam Palatha East   | 420                                                          | 3.7                                      | 43                                                        |
| 10 | Thalawa                  | 368                                                          | 3.2                                      | 38                                                        |
| 11 | Mihinthale               | 325                                                          | 2.9                                      | 34                                                        |
| 12 | Thambuttegama            | 312                                                          | 2.7                                      | 32                                                        |
| 13 | Nochchiyagama            | 310                                                          | 2.7                                      | 32                                                        |
| 14 | Kekirawa                 | 297                                                          | 2.6                                      | 31                                                        |
| 15 | Galnewa                  | 180                                                          | 1.6                                      | 19                                                        |
| 16 | Rajanganaya              | 179                                                          | 1.6                                      | 19                                                        |
| 17 | Thirappane               | 171                                                          | 1.5                                      | 18                                                        |
| 18 | Iplogama                 | 130                                                          | 1.1                                      | 13                                                        |
| 19 | Palagala                 | 103                                                          | 0.9                                      | 11                                                        |
|    |                          | <b>11346</b>                                                 | <b>100.0</b>                             | <b>1174</b>                                               |
